# Supplementary material for: Micropatterned biofunctional lubricant-infused surfaces promote selective localized cell adhesion and patterning
Source: Royal Society of Chemistry journal article supplement (doi:10.1039/c9lc00608g), 2019-01-01
Supplement: c9lc00608g1.pdf [file c9lc00608g1.pdf]

**Supplementary file**

# Micropatterned Biofunctional Lubricant-Infused Surfaces Promote Selective Localized Cell Adhesion and Patterning

*Sara M. Imani*<sup>1</sup>, *Maryam Badv*<sup>1</sup>, *Amid Shakeri*<sup>2</sup>, *Hanie Yousefi*<sup>3</sup>, *Darren Yip*<sup>2</sup>,

*Claire Fine*<sup>2</sup>, *Tohid F. Didar*<sup>\*1,2,4</sup>

<sup>1</sup>School of Biomedical Engineering, McMaster University, Hamilton, Ontario, Canada.

<sup>2</sup>Department of Mechanical Engineering, McMaster University, Hamilton, Ontario, Canada.

<sup>3</sup>Department of Pharmaceutical Sciences, University of Toronto, Toronto, Ontario, Canada.

<sup>4</sup>Institute for Infectious Disease Research (IIDR), McMaster University, Hamilton, Ontario,  
Canada

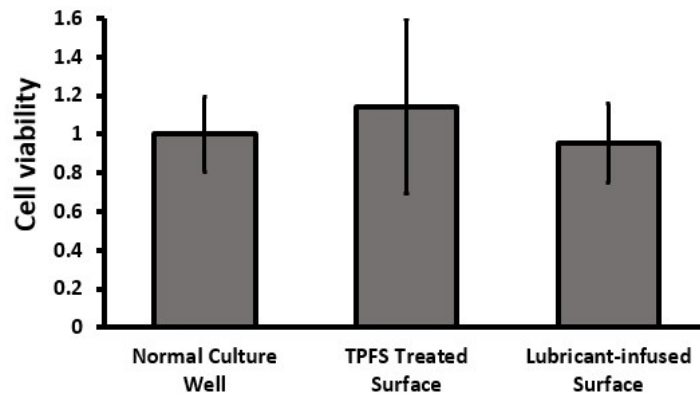

**Supplementary Figure 1 - Evaluating cytotoxicity of the surfaces by MTT assay.** To assess the interaction of the cell with the developed lubricant-infused coating and evaluate the potential cytotoxicity, we tested the surface with MTT assay after 48 hours of incubation with HUVECs. As control groups we added TPFS treated surface, as well as a normal culture well and all results we normalized to the culture well. As shown in the graph, there is no significant difference between the three control groups, meaning that the cells show similar metabolic activity when comparing the developed surfaces to a normal culture well.
